# Supplementary material for: Genome-Wide Analysis of LRR-RLK Gene Family in Four Gossypium Species and Expression Analysis during Cotton Development and Stress Responses
Source: MDPI journal article supplement (doi:10.3390/genes9120592), 2018-11-29

Figure S2: NJ tree constructed by MEGA7 based on LRR-RLK family members of *A. thaliana* and *Gossypium*.

Amino acid sequences of LRR-RLKs from *A. thaliana* and *Gossypium* were aligned by MUSCLE software with default parameters. Aligned sequenced were used to construct NJ tree by MEGA7 with 1000 bootstraps. Only topology of tree was display. Bootstrap values lower than 50 were hidden.

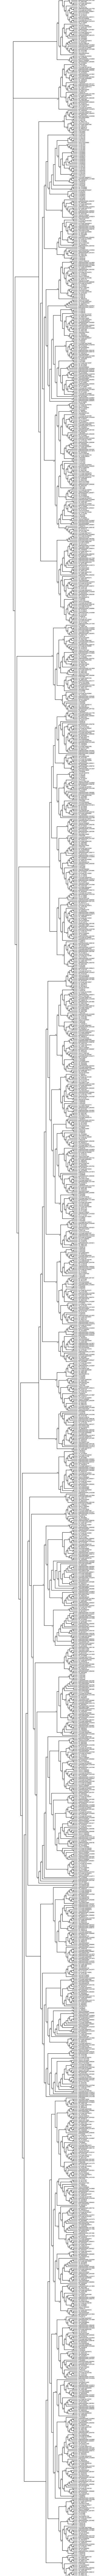

Supplement: s1 [file s1]
