# Supplementary material for: Genome-Wide Analysis of LRR-RLK Gene Family in Four Gossypium Species and Expression Analysis during Cotton Development and Stress Responses
Source: MDPI journal article supplement (doi:10.3390/genes9120592), 2018-11-29

**Figure S3: Chromosomal location of *LRR-RLK* genes from four *Gossypium* species.**

*LRR-RLK* genes from *G. arboreum*, *G. barbadense*, *G. hirsutum*, *G. raimondii* were mapped to chromosomes based on chromosomal coordinates extracted from gene feature annotation files (shown by A, B, C, D, respectively). *LRR-RLK* genes located on scaffolds were not shown. Tandem duplication gene sets were highlighted by red border rectangles to represent.

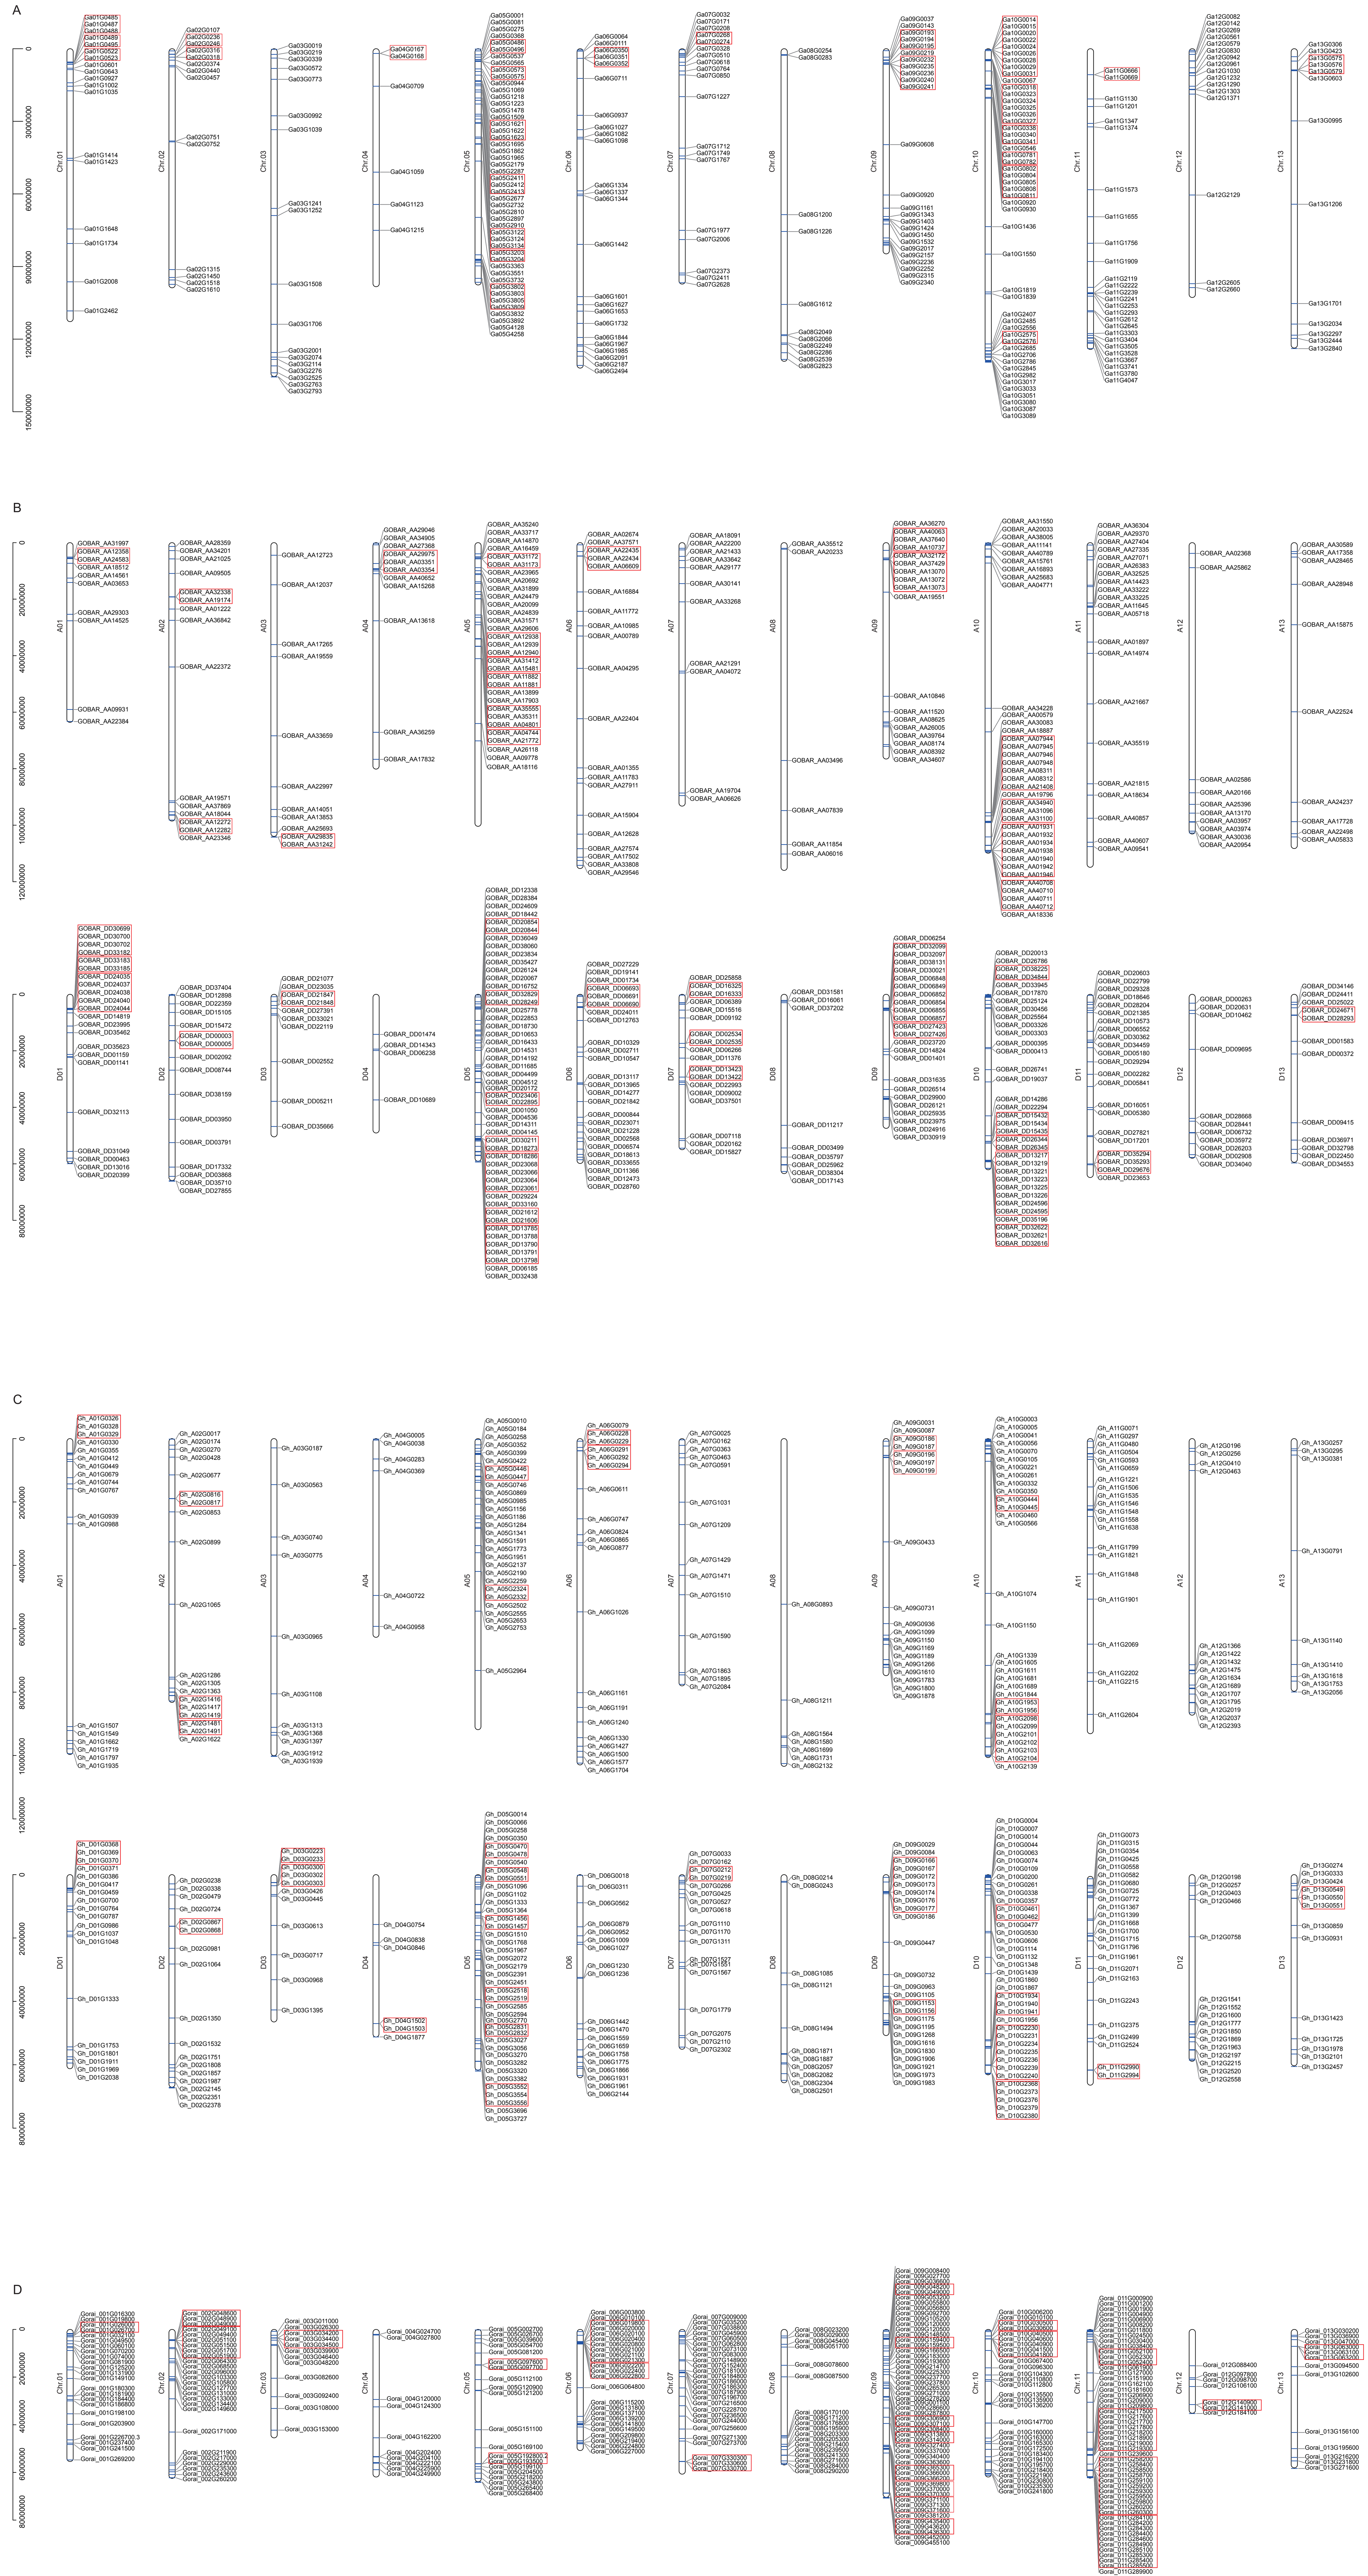

Supplement: s1 [file s1]
