# Supplementary figures and images for: Genome-Wide Analysis of LRR-RLK Gene Family in Four Gossypium Species and Expression Analysis during Cotton Development and Stress Responses
Source: MDPI journal article supplement (doi:10.3390/genes9120592), 2018-11-29

A

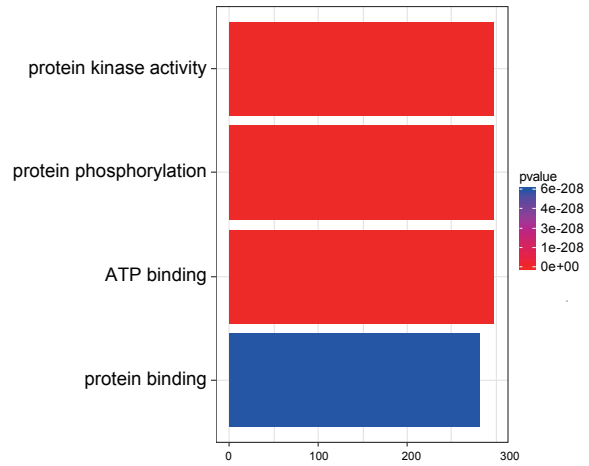

B

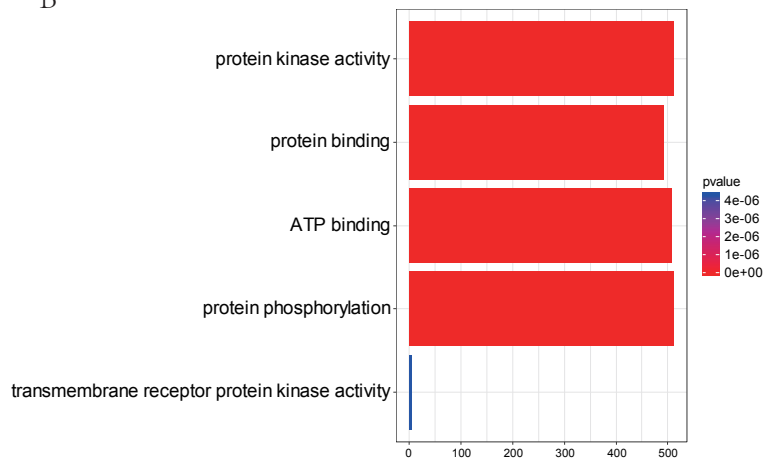

C

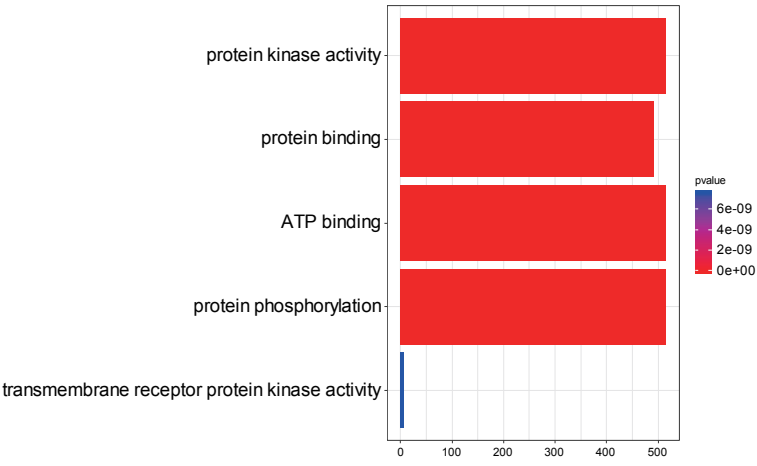

D

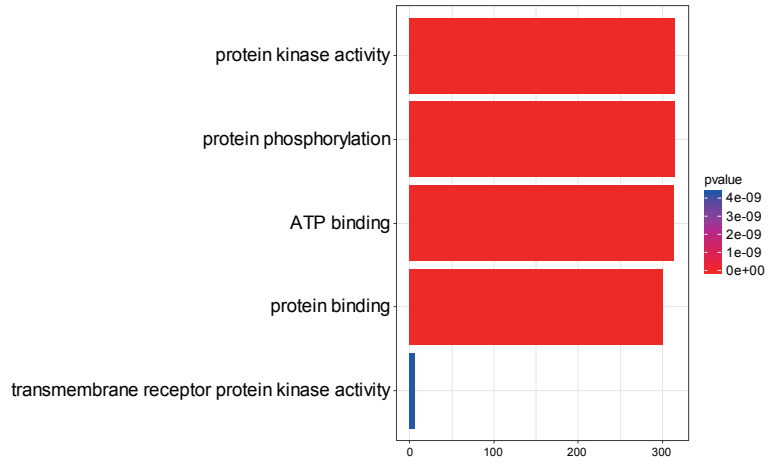

Supplement: s1 [file s1]
